# Supplementary material
Source: Springer Nature journal article supplement (https://www.springermedizin.de/resource/supplementary/12913_2011_2437_MOESM2_ESM.pdf/9531266)

2002

2004

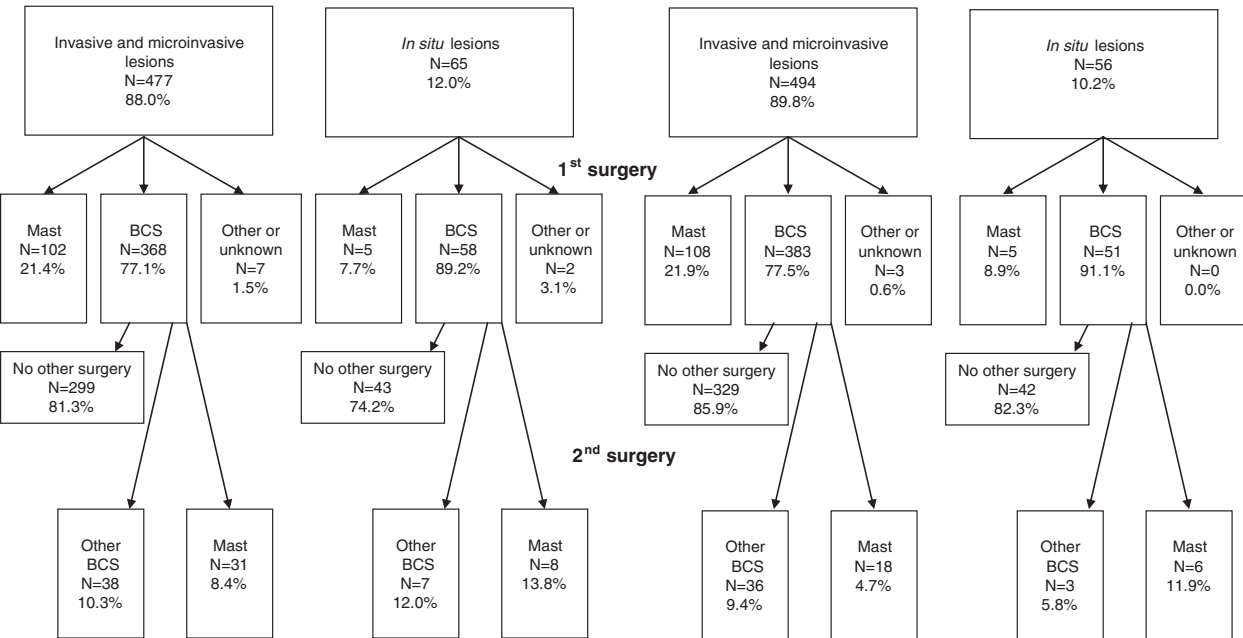

Mast: mastectomy, BCS: breast conservative surgery.

Supplement: MOESM2 [file 9531266]
